1

2 Title: Examining the Role of the Surfactant Family Member SFTA3 in Interneuron Specification

3

4 Authors: Christopher Y. Chen<sup>a</sup>, Nickesha C. Anderson<sup>a</sup>, Sandy Becker<sup>a</sup>, Martin Schicht<sup>b</sup>, Christopher  
5 Stoddard<sup>c</sup>, Lars Bräuer<sup>b</sup>, Friedrich Paulsen<sup>b</sup>, and Laura Grabel<sup>a</sup>

6 <sup>a</sup>Dept. of Biology, Wesleyan University, 52 Lawn Avenue, Middletown, CT 06459 USA

7 <sup>b</sup>Institute of Functional and Clinical Anatomy, Friedrich Alexander University Erlangen-Nürnberg (FAU),  
8 Erlangen, Germany

9 <sup>c</sup>Genome Sciences, University of Connecticut Health, 263 Farmington Avenue, Farmington CT 06030

10

11 Email addresses:

12 Christopher Y Chen: [cychen@wesleyan.edu](mailto:cychen@wesleyan.edu)

13 Nickesha Anderson: [ncanderson@wesleyan.edu](mailto:ncanderson@wesleyan.edu)

14 Sandy Becker: [sbecker@wesleyan.edu](mailto:sbecker@wesleyan.edu)

15 Martin Schicht: [martin.schicht@fau.de](mailto:martin.schicht@fau.de)

16 Christopher Stoddard: [stoddard@uchc.edu](mailto:stoddard@uchc.edu)

17 Lars Bräuer: [lars.braeuer@fau.de](mailto:lars.braeuer@fau.de)

18 Friedrich Paulsen: [friedrich.paulsen@fau.de](mailto:friedrich.paulsen@fau.de)

19 Laura Grabel: [lgrabel@wesleyan.edu](mailto:lgrabel@wesleyan.edu)

20 Correspondence should be addressed to:

21 Christopher Y Chen

22 646-610-2893 (phone)

23 860-685-3279 (fax)

24 52 Lawn Ave

25 Middletown, CT 06459

26 [cychen@wesleyan.edu](mailto:cychen@wesleyan.edu)

27

28 The authors declare no potential conflicts of interest.

29 **Abstract:**

30 The transcription factor *NKX2.1*, expressed at high levels in the medial ganglionic eminence (MGE), is a  
31 master regulator of cortical interneuron progenitor development. To identify gene candidates with  
32 expression profiles similar to *NKX2.1*, previous transcriptome analysis of human embryonic stem cell  
33 (hESC)-derived MGE-like progenitors revealed *SFTA3* as the strongest candidate. Quantitative real-time  
34 PCR analysis of hESC-derived NKX2.1-positive progenitors and transcriptome data available from the  
35 Allen Institute for Brain Science revealed comparable expression patterns for *NKX2.1* and *SFTA3* during  
36 interneuron differentiation *in vitro* and demonstrated high *SFTA3* expression in the human MGE.  
37 Although *SFTA3* has been well studied in the lung, the possible role of this surfactant protein in the MGE  
38 during embryonic development remains unexamined. To determine if *SFTA3* plays a role in MGE  
39 specification, *SFTA3*<sup>-/-</sup> and *NKX2.1*<sup>-/-</sup> hESC lines were generated using custom designed CRISPRs. We  
40 show that *NKX2.1* KO mice have a significantly diminished capacity to differentiate into MGE interneuron  
41 subtypes. *SFTA3* KO mice also demonstrated a somewhat reduced ability to differentiate down the MGE-like  
42 lineage, although not as severe relative to *NKX2.1* deficiency. These results suggest *NKX2.1* and *SFTA3*  
43 are co-regulated genes, and that deletion of *SFTA3* does not lead to a major change in the specification of  
44 MGE derivatives.

45 **Introduction:**

46 During early embryonic development of the mammalian telencephalon, the transcription factor  
47 *NKX2.1* is highly expressed in the medial ganglionic eminence (MGE), a subpallidal structure of the  
48 ventral forebrain (1-3). The MGE and caudal ganglionic eminence (CGE) are transient embryonic  
49 structures that are the primary source of GABAergic inhibitory progenitors, which migrate tangentially to  
50 target sites in the cortex. These progenitors then differentiate into a number of diverse inhibitory  
51 interneuron subtypes that modulate the activity of excitatory projection neurons in the cerebral cortex (3-  
52 8). Expression of the homeobox protein NKX2.1 is a requirement for specification of the MGE and its  
53 derivatives. *NKX2.1* deficient mice display gross malformations of the ganglionic eminences and a

54 complete loss of specific MGE-derived subtypes such as parvalbumin (PV) and somatostatin (SST) -  
55 expressing interneurons (Butt et al., 2008; Du et al., 2008; Ohkubo et al., 2002). The experimental  
56 downregulation of *NKX2.1* in the ventral subpallium results in a conversion of MGE to CGE fates. In  
57 *NKX2.1* conditional loss-of-function studies in mice, an increase in the generation of vasoactive intestinal  
58 polypeptide (VIP) and calretinin (CR)-expressing interneurons derived from the CGE is produced at the  
59 expense of MGE subtypes (9-11). These results indicate *NKX2.1* is a master regulator that establishes the  
60 MGE and promotes specification of interneuron subtypes.

61 To identify gene candidates with expression profiles similar to *NKX2.1* that could also help  
62 specify the MGE lineage, we utilized previously published data from our laboratory comparing the RNA-  
63 seq-based transcriptome of FACS isolated human embryonic stem cell (hESC) -derived *NKX2.1*-positive  
64 progenitors to *NKX2.1*-negative cells. This analysis showed that the profile of surfactant associated 3  
65 (*SFTA3*) expression closely followed *NKX2.1*, suggesting it was a novel MGE marker that could be  
66 involved in interneuron specification (12).

67 *SFTA3*, which encodes surfactant protein H, is part of the multifunctional surfactant gene family,  
68 implicated in immune host defense and regulation of alveolar surface tension during normal respiratory  
69 mechanics of the lung. To date, there are four surfactant proteins, A, B, C, and D, that have been  
70 extensively characterized in the lung. Surfactant proteins A and D are associated with the collectin gene  
71 family and are implicated in immunoregulatory host defense. These proteins contain a lectin domain to  
72 allow surfactant binding of viruses, fungi, and bacteria, facilitating opsonization for phagocytic digestion  
73 and removal (13, 14). In contrast, SP-B and SP-C are hydrophobic proteins required for stabilization of  
74 the air-liquid interface at the lung surface to prevent collapse of the alveoli (15, 16). Recently, *SFTA3*  
75 was identified by bioinformatics as a novel secretory surfactant protein expressed in the human lung (17).  
76 Interestingly, *SFTA3* shares very little sequence or structural similarity when compared to other  
77 surfactants or proteins in general. The BLAST search tool algorithm in conjunction with the Uniprot  
78 protein database revealed SP-H homologs in primate species only, including humans. No matches were

79 found when additional BLAST searches were performed comparing the SP-H sequence to 3D  
80 biochemical structures listed in the Protein Data Bank (17).

81 Numerous sequence-based prediction tools used to identify post-translational modification (PTM)  
82 sites in the SP-H sequence suggested a high probability of palmitoylation, glycosylation, and  
83 phosphorylation. These data suggest that SFTA3 is an amphiphilic protein that can acquire both  
84 hydrophobic and hydrophilic properties (17). Western blot analysis using an anti-SP-H antibody in the  
85 A549 alveolar lung cell line detected a distinct band for the expressed protein at ~13kDa (17). Similar to  
86 the other proteins in the surfactant family, studies demonstrate that SFTA3 has a role in innate immune  
87 response localized to the lipid plasma membrane surface (17, 18). Computer simulations investigating the  
88 binding affinity of SP-H with dipalmitoylphosphatidylcholine (DPPC), the most prevalent lipid in  
89 pulmonary surfactant, illustrated protein stability for SP-H at the lipid surface (19). These data suggest  
90 PTMs are responsible for the amphiphilic properties of *SFTA3* in specifying either surface regulatory or  
91 immune defense function.

92 *SFTA3* is a single copy gene immediately adjacent to *NKX2.1* on chromosome 14q13.3. This  
93 location, combined with their correlated temporal and spatial patterns of expression suggest that *NKX2.1*  
94 and *SFTA3* may regulate common developmental pathways. For example, *NKX2.1* is also expressed  
95 during early development of the lungs and is implicated in promoting the production of surfactants in  
96 alveolar cells. The production of surfactant is perturbed upon disruption of the *NKX2.1* gene (20).  
97 Moreover, patients with mutations in *SFTA3* display a variety of aberrant symptomology including  
98 choreoathetosis, hypothyroidism, and neonatal respiratory disease (21). Approximately 50% of patients  
99 with mutations in *NKX2.1* develop the same clinical phenotypes of motor ataxia and respiratory distress,  
100 all part of a larger connected network of disorders known as “brain-lung-thyroid syndrome” (OMIM  
101 610978) (22). The mouse orthologue of *SFTA3* is NKX2.1-associated noncoding intergenic RNA  
102 (NANCI). Recent studies demonstrate a regulatory role for NANCI in *NKX2.1* expression in the mouse  
103 lung (23, 24). Intriguingly, whereas the human *SFTA3* gene contains an apparent open reading frame that  
104 is translated, mouse NANCI encodes a long non-coding RNA with no apparent open reading frames. The

105 potential interaction between *NKX2.1* and *SFTA3* is largely unexamined, and a function for *SFTA3*  
106 outside of the lung has not been established.

107 We now show using quantitative PCR (qRT-PCR) analysis upregulation in *SFTA3* gene  
108 expression during differentiation of hESC-derived progenitors to an MGE-like fate. The BrainSpan Atlas,  
109 an open source database using RNA-sequencing to profile cortical and subcortical structures at various  
110 time points during early embryonic development, indicates *SFTA3* expression is selectively upregulated  
111 in the MGE at 8-9 weeks gestation. We generated *SFTA3* and *NKX2.1* knock-out (KO) hESC lines using  
112 CRISPR-Cas9 genome editing in order to examine two fundamental questions. First, to determine if  
113 *NKX2.1* and *SFTA3* genes are co-regulated such that the deletion of one gene will modify the expression  
114 pattern of the other. Second, to determine if *SFTA3* serves a functional role in the specification of MGE  
115 GABAergic progenitors and their differentiation into mature inhibitory interneuron subtypes. An *NKX2.1*  
116 KO cell line, expected to be deficient in specifying MGE-derived interneuron subtypes, served as a  
117 control to determine *SFTA3* function in specifying MGE lineage identity. The deletion of *NKX2.1*  
118 resulted in a dramatic reduction in *SFTA3* expression and a significant decline in the number of cells  
119 expressing SP-H. In contrast, the loss of *SFTA3* led to no decline in *NKX2.1* message and a slight  
120 decrease in the number of cells expressing NKX2.1 protein. Additionally, the absence of *NKX2.1* resulted  
121 in the virtual elimination of MGE-like gene expression with a concomitant increase in expression of non-  
122 MGE cell fates including dorsal forebrain and CGE phenotypes. Mutations to *SFTA3* resulted only in a  
123 moderate decrease in MGE-associated gene expression with no concomitant increase to non-MGE  
124 derivatives.

## 125 **Materials and Methods:**

### 126 **Generation of KO cell lines**

127 A dual sgRNA-directed gene knockout approach using CRISPR-Cas9 was used to remove a portion of the  
128 *SFTA3* gene. One guide sequence was designed to cut upstream of exon 2 and a second guide sequence  
129 was designed to cut downstream of exon 2. Deletion of exon 2 resulted in an early termination and a

130 severely truncated protein. For deletion of *NKX2.1*, two sgRNA-directed CAS9 nuclease were targeted to  
131 flank the entire gene to remove all isoforms of *NKX2.1*, completely removing all exons from the genome.  
132 Guide RNA sequences were cloned into addgene plasmid #62988. The dual sgRNA vector was  
133 electroporated into H9 hESC cells using a Gene Pulser X (250 V, 500 uF). Cells were plated and after 24  
134 hours, puromycin was supplemented into the medium at 1 ug/ml. Puromycin was added for a total of 48  
135 hours to select for the transient expression of the dual sgRNA vectors. After 14 days, clones were  
136 isolated, expanded and tested by PCR. Clones were screened for deletion, inversion, and zygosity by  
137 PCR. Double KO clones were further expanded and sequenced across the junction to confirm genomic  
138 deletion. The same procedures described above were performed to derive control lines with the exception  
139 that no gRNA sequence was used during vector electroporation.

#### 140 **Culture of ESCs and MGE-like cells**

141 hESC *SFTA3* and *NKX2.1* control and KO cell lines were maintained and passaged as previously  
142 described (25). Neural differentiation of ESCs was initiated using the ALK2/3 inhibitor LDN-193189  
143 (Stemgent, 100 nM) and progenitors ventralized to an MGE-like identity by a combination of sonic  
144 hedgehog (R&D Systems, 125 ng/mL) and its agonist purmorphamine (Calbiochem, 1  $\mu$ M) as previously  
145 described (26).

#### 146 ***In vitro* maturation of hESNPs**

147 The addition of the ROCK inhibitor Y27632 (1  $\mu$ M, Calbiochem) was supplemented into every medium  
148 change of *SFTA3* control and KO progenitors beginning at differentiation day 21 until day of fixation.

#### 149 **Immunocytochemistry**

150 The fixation, permeabilization, and incubation of primary and secondary antibodies were performed as  
151 previously described (Chen et al., 2016). The following antibodies were used: DLX2 (Proteintech, rabbit,  
152 1:50), Olig2 (Proteintech, rabbit, 1:100), DCX (Millipore, guinea pig, 1:500), FOXP1 (abcam, rabbit,  
153 1:100), GABA (Sigma, rabbit, 1:500), MAP2 (Sigma, mouse, 1:1000), *NKX2.1* (Chemicon, mouse,  
154 1:250), and Nestin (Millipore, mouse, 1:1000). Hoechst 3342 (Molecular Probes) was used to

155 counterstain all cell nuclei and slides coverslipped with gelvatol. Images used for quantification were  
156 taken on a Nikon Eclipse Ti microscope with NIS-Elements software.

### 157 **Quantitative Real Time PCR**

158 Quantitative measurements of mRNA expression were performed using the 7300 Real Time PCR System  
159 (Applied Biosystems) as previously described (12).

### 160 **RNA Sequencing and Bioinformatics Analyses**

161 Characterization of the transcriptomes comparing NKX2.1-positive and NKX2.1-negative populations  
162 using shotgun mRNA sequencing (RNA-seq) was performed as previously described (12). RNA-Seq data  
163 from the BrainSpan Atlas of the Developing Human Brain (<http://brainspan.org>) was assessed as  
164 previously described (12).

## 165 **Results**

### 166 **Comparative Gene Expression Analysis of SFTA3 and NKX2.1 in MGE-like interneuron** 167 **progenitors and Fetal Brain tissue.**

168  
169 We used RNA-sequencing analysis to compare the transcriptome of NKX2.1-positive and NKX2.1-  
170 negative neural progenitors to identify genes whose expression was enriched in the NKX2.1-positive  
171 MGE-like population. SFTA3 expression was consistently enriched in the NKX2.1-positive population,  
172 and to the same extent observed for NKX2.1 (>8 fold gene enrichment) (Chen et al., 2016; Figure 1A).  
173 The expression values for *SFTA3* are comparable to *NKX2.1*, with a correlative-coefficient R value >0.98;  
174 indicating strong statistical significance in fold change enrichment between these two genes  
175 (Supplementary Table 1).

176 We used RT-PCR analysis to examine expression levels of these two genes at specific time points  
177 during the differentiation of hESC-derived interneurons. Both genes were upregulated in a similar time  
178 course, consistent with shared regulatory elements (Figure 1B). Recently, an enhancer sequence region  
179 that may confer ventral forebrain expression was identified on chromosome 14 near the *NKX2.1* and  
180 *SFTA3* genes (Patent Seq ID No. 144). This shared enhancer region may be responsible for upregulating

181 the transcription of both *SFTA3* and *NKX2.1*. Additionally, immunocytochemistry revealed a large  
182 percentage of neural progenitors at day 26 of differentiation co-expressed NKX2.1 and SP-H (Figure 1C).

183 To investigate whether *SFTA3* is expressed during the development of the human fetal brain, we  
184 examined transcriptome data from the BrainSpan Atlas. The Atlas indicates enrichment of *SFTA3* in the  
185 MGE at 8 post-conception weeks (pcw) (Figure 1D). Furthermore, when comparing the expression levels  
186 of *SFTA3* to all brain structures at 8 pcw, the MGE is the only structure to demonstrate a significant  
187 elevation in expression of the gene (Figure 1D). These results suggest that *SFTA3* is a novel biomarker  
188 specific to the MGE during early ventral forebrain development.

189

### 190 **Day 25 Characterization of SFTA3 and NKX2.1 Knock-out Neural Progenitors**

191 Given the highly correlative spatiotemporal gene expression patterns of *NKX2.1* and *SFTA3* during *in*  
192 *vitro* differentiation of FACS-enriched NKX2.1-positive neural progenitors and in the human MGE at 8  
193 pcw (Figure 1), we determined whether *SFTA3* plays a role in specifying MGE-like neural progenitors, as  
194 observed for *NKX2.1*. To investigate *SFTA3* gene function, *NKX2.1* and *SFTA3* control and knockout  
195 hESCs were generated using CRISPR-Cas9 mediated genome editing. To verify successful KO of each  
196 gene, we performed qRT-PCR at day 25 of differentiation, when both genes are expressed at significant  
197 levels. Day 25 qRT-PCR analysis of NKX2.1 control and KO progenitors indicated no detectable RNA  
198 transcripts of *NKX2.1* in the KO cell line (Supplementary Figure 1A). In addition, the deletion of *NKX2.1*  
199 significantly reduced *SFTA3* transcript levels, suggesting *NKX2.1* is needed to maintain control levels of  
200 *SFTA3* gene expression (Supplementary Figure 1A). Both *SFTA3* KO cell lines had no detectable RNA  
201 transcripts for *SFTA3*. Interestingly, *NKX2.1* RNA expression is not significantly affected in *SFTA3* KO  
202 lines (Supplementary Figure 1B; Figure 2B). We also examined levels of protein expression for these two  
203 genes. Immunocytochemistry at differentiation day 30, revealed the absence of NKX2.1 and SP-H protein  
204 in their respective KO cell lines (Supplementary Figure 1C). Whereas qRT-PCR showed little change in  
205 *NKX2.1* expression in *SFTA3* KOs, both *SFTA3* KO lines had lower levels of NKX2.1 protein (Figure 2C,  
206 D).



207 To investigate *SFTA3* gene function in the specification of MGE cell fate, *NKX2.1* and *SFTA3*  
208 control and knockout hESCs were differentiated to MGE-like neural progenitors *in vitro* for 25 days and  
209 analyzed for expression of several neural markers using qRT-PCR. Again, no *NKX2.1* was detected in the  
210 KO cell line, verifying gene deletion (Figure 2A). Markers of the MGE (*SFTA3*, *DLX1*, *NKX6.2*, *LHX6*),  
211 ventral telencephalon (*ASCL1*, *RAX*) and prosencephalon (*FOXG1*, *GAD2*) displayed significantly  
212 decreased levels of expression in the *NKX2.1* KO relative to the control cell line (Figure 2A). Expression  
213 of choline acetyltransferase (*CHAT*), an enzyme that synthesizes acetylcholine in cholinergic neurons, also  
214 exhibited a significant decrease in the *NKX2.1* KO compared to the control. In addition, expression of  
215 markers of dorsal telencephalon and CGE lineage (*Pax6*, *NR2F2*, *SP8*) were enriched in the *NKX2.1* KO  
216 relative to controls (Figure 2A). There was no significant difference in expression levels of *FOXPI*, a  
217 marker of hypothalamic neurons, in the *NKX2.1* KO relative to its control (Figure 2A, B). These data are  
218 consistent with *in vivo* studies that demonstrate a re-specification of MGE to non-MGE cell neural fates in  
219 conditional *NKX2.1* KO mutant mice (3, 9, 27, 28)

220 No detectable *SFTA3* mRNA transcripts were observed in the two *SFTA3* KO cell lines, verifying  
221 gene mutation (Figure 2B). Though the *SFTA3* KOs showed a general trend towards decreased gene  
222 expression of markers of the ventral telencephalon and MGE (*Ascl1*, *DLX1*, *NKX6.2*, *GAD2*, and *LHX6*),  
223 the downward trend was not as severe as observed for the *NKX2.1* KOs. Intriguingly, contrary to what  
224 was observed in the *NKX2.1* KO cell population, there was no compensatory increase of dorsal forebrain  
225 and CGE neural lineage markers (*PAX6*, *NR2F2*, *SP8*) in the *SFTA3* KO cells (Figure 2B). These data  
226 suggest a discrepancy in phenotype between *NKX2.1* and *SFTA3* KO RNA expression levels, suggesting  
227 *SFTA3* is not solely responsible for conferring MGE fate downstream of *NKX2.1*.

228 We next examined the expression of neural stem cell (NSC), immature neuronal, and ventral  
229 progenitor markers in both our control and KO generated cell lines. Greater than 95% of the cells at day  
230 25 in all cell lines expressed the NSC marker nestin, indicating that KO of *NKX2.1* or *SFTA3* did not  
231 interfere with neural differentiation (Figure. 2D). While 7.57%, 8.17%, and 11.74% of the *NKX2.1*

232 control cells expressed DLX2, Olig2, and FOXP1 respectively, only 1.40%, 1.51%, and 5.04% of cells  
233 expressed these markers in the *NKX2.1* KO cell population, indicating a significant reduction in  
234 interneuron progenitor differentiation (Figure 2C, D). *SFTA3* KO progenitors did not display the same  
235 decline in comparison to the control cells. Intriguingly, there was a marginal but significant decrease in  
236 cells expressing NKX2.1, OLIG2, and FOXP1 protein expression for both *SFTA3* KO lines in  
237 comparison to the control (Figure 2C, D). Consistent with the high percentage of cells expressing  
238 immature NSC markers at day 25, there was no significant expression of the inhibitory neurotransmitter  
239 GABA at this time point (<2%; Figure 2D). Surprisingly, the percentage of cells expressing DCX, a post-  
240 mitotic neuronal migration marker and MAP2, a mature neuronal marker, was somewhat higher in the  
241 *SFTA3* KO lines (8-11%; 4-5%, respectively) compared to its control (4.4%; 2.6%, respectively; Figure  
242 2D). This suggests *SFTA3* may play a role in preventing premature differentiation of neural progenitors  
243 and keeping them at the NSC stage. As observed with RNA data, declines in levels of cells expressing  
244 MGE and forebrain protein markers were not as dramatic for the *SFTA3* KOs as the *NKX2.1* KOs relative  
245 to controls. Overall, the mutation of *SFTA3* alone was not sufficient to diminish expression of MGE and  
246 subpallidal markers to *NKX2.1* KO levels, as *SFTA3* KOs showed only a moderate reduction in NKX2.1  
247 expression. Taken together, these results suggest that *SFTA3* does not have a central role in specifying  
248 MGE-like progenitor cell lineage as established for *NKX2.1*.

249

## 250 **Day 45 Characterization of *SFTA3* and *NKX2.1* Knock-Out Neural Cell Populations**

251 To evaluate whether the absence of *SFTA3* affects the differentiation of hESC-derived GABAergic  
252 progenitors into inhibitory interneurons, neural progenitor cells were cultured for an additional 20 days  
253 and analyzed at day 45 *in vitro*. As hESC-derived interneurons demonstrate a protracted developmental  
254 timeline for maturation, maintaining long-term cultures for immunocytochemical analysis was difficult,  
255 with some cell lines demonstrating decreased viability at time of analysis. The loss of *NKX2.1* or *SFTA3*  
256 expression did not significantly affect maturation of the neural progenitors, as there was comparable

257 expression of both DCX and MAP2 in all KO lines compared to controls (Figure. 3 A, B). Day 45  
258 neurons generated from the NKX2.1 KO line exhibited minimal GABA expression, (< 1%) relative to  
259 control cells at this time point (> 38%), consistent with a role for NKX2.1 in conferring GABAergic  
260 inhibitory identity. Immunocytochemistry-based quantification of *SFTA3* mutants indicated ~10%  
261 GABA expression in both *SFTA3* knockout lines compared to ~18% expression in the control,  
262 demonstrating that the deletion of *SFTA3* did not eliminate neural progenitor differentiation down the  
263 GABAergic lineage (Figure 3A, B).

264

## 265 **Discussion**

266 The transcription factor *NKX2.1* is a master regulator of MGE-specific lineages, promoting the expression  
267 of genes involved in specifying cortical inhibitory interneuron progenitors and helping to maintain proper  
268 ratios of mature interneuron subtypes in the adult brain (3, 29, 30). This report highlights the  
269 identification of a surfactant gene that is expressed in NKX2.1-positive cells and may support inhibitory  
270 interneuron differentiation, though not as robustly as *NKX2.1*. Based upon transcriptome and qRT-PCR  
271 analysis, we identify *SFTA3* as a novel MGE marker (Figure 1) and examine *SFTA3*'s role in interneuron  
272 differentiation by generating *NKX2.1* and *SFTA3* KO hESC lines and determining their ability to produce  
273 MGE-subtypes and derivatives. We show that MGE-lineage specific markers and interneuron subtypes  
274 are only marginally decreased when *SFTA3* is mutated, whereas the *NKX2.1* KO showed significant  
275 depletion in both GABAergic neural progenitor and cortical inhibitory interneurons. By day 25 of  
276 differentiation, *NKX2.1* KO progenitors showed significant levels of enrichment in expression of dorsal  
277 and CGE-associated genes at the expense of MGE marker expression (Figure 2A). Surprisingly, at day  
278 45, despite our observation that non-MGE like interneuron progenitors were present at day 25, no cells  
279 expressing GABA were detected in the *NKX2.1* KO. This suggests the non-MGE alternative fated cells  
280 specified at day 25 could not mature under our *in vitro* conditions. (Figure 3A, B; Butt et al., 2008;  
281 Sussel et al., 1999).

282 Analysis of RNA expression levels for *ASCL1*, a proneural gene associated with promoting cell  
283 cycle exit and neuronal differentiation was reduced in both *SFTA3* KO lines in comparison to the control.  
284 Additionally, immunocytochemistry data interestingly showed a significant increase in the percentage of  
285 cells that expressed DCX and MAP2 in the *SFTA3* KOs relative to the control at day 25 of  
286 differentiation. These results highlight a possible function of *SFTA3* as a cell-cycle regulator of MGE-like  
287 progenitors during neurogenesis.

288 The orthologue of the human *SFTA3* gene in rodents is NANCI, which appears to encode a long  
289 noncoding RNA (lncRNA). A comparison of coding sequences using nucleotide BLAST algorithms was  
290 performed in order to understand why human *SFTA3* is a protein encoding gene and mouse NANCI a  
291 lncRNA (data not shown). The NANCI coding sequence lacks long open reading frames due to the  
292 presence of numerous translational stop codons interspersed throughout the sequence. In contrast, the  
293 human *SFTA3* coding sequence contains long uninterrupted open reading frames that do not contain stop  
294 codons, consistent with protein coding regions. Recently, Herriges and colleagues observed nearly  
295 identical expression patterns during development for both NANCI and *NKX2.1* in the mouse lung  
296 epithelium and forebrain (23). Heterozygous NANCI mouse mutants had decreased levels of *NKX2.1*  
297 expression but did not display significant morphological defects in the lungs. Furthermore, heterozygous  
298 *NKX2.1* mutants showed a compensatory increase in NANCI expression, resulting in an upregulation of  
299 *NKX2.1* expression back to wild-type levels (24). These data suggest that NANCI may function as a  
300 regulator of *NKX2.1* expression. We observed similar tissue specific *NKX2.1* and *SFTA3* gene expression  
301 patterns in *in vitro* derived MGE-like progenitor cell population and in transcriptome data of human 8  
302 pcw MGE fetal tissue. Despite similarities in the tissue specificity of expression of *SFTA3* and NANCI,  
303 our data do not support a role for *SFTA3* in regulating *NKX2.1* expression. Further investigation to verify  
304 the presence and potential function of an *SFTA3* long noncoding RNA in human cells is needed.

305 In summary, our data demonstrate that the expression of *SFTA3* and *NKX2.1* are coordinated  
306 during differentiation of hESCs *in vitro* to an MGE-like fate. Deletion of *SFTA3* only marginally affects

307 the expression of *NKX2.1*, and does not lead to any major changes in the expression profiles of MGE  
308 markers and interneuron derivatives. Further research is needed to fully assess the functional differences  
309 between *SFTA3/NANCI* and *NKX2.1* in rodents and humans.

310

311

312

313

314

315

316

317 **Figure Legends:**

318 **Figure 1.** Comparative gene expression analysis of *SFTA3* and *NKX2.1*. A) *SFTA3* and *NKX2.1* pairwise  
319 gene expression analysis indicates significant levels of enrichment in the NKX2.1-positive progenitor  
320 population in comparison to the NKX2.1-negative cohort. Fold change differences of 2, 4, and 8 between  
321 samples are represented by central diagonal lines. Orange and blue points signify enriched and depleted  
322 differentially expressed genes (FDR<0.05) comparing NKX2.1-positive to NKX2.1-negative progenitor  
323 populations with the total number of genes indicated for each category. B) RT-PCR analysis of *SFTA3*  
324 and *NKX2.1* gene expression at specific time points during the hESC differentiation timeline. C) *In vitro*  
325 day 26 immunocytochemistry and quantification of neural progenitors for NKX2.1 and SP-H. Data  
326 represented as  $\pm$  SEM. Scale bar = 100  $\mu$ m. D) RNA-seq comparison of FACS isolated NKX2.1-  
327 positive and NKX2.1-negative cell populations in comparison to the developmental transcriptome of  
328 various structures of the human brain at 8 and 9 pcw. Brain structure legend: DTH, dorsal thalamus; DFC,  
329 dorsolateral prefrontal cortex; HIP, hippocampus; OFC, orbital frontal cortex; Ocx, occipital neocortex;  
330 MFC, anterior cingulate cortex; PCx, parietal neocortex; URL, upper rhombic lip; VFC, ventrolateral  
331 prefrontal cortex; STC, posterior superior temporal cortex; M1C-S1C, primary motor-sensory cortex;  
332 ITC, inferolateral temporal cortex; AMY, amygdaloid complex; CGE, caudal ganglionic eminence; LGE,  
333 lateral ganglionic eminence; MGE, medial ganglionic eminence.  
334

335 **Figure 2.** Characterization of day 25 *SFTA3* and *NKX2.1* KO neural progenitors from hESCs. A) RT-  
336 PCR data comparing gene expression levels between *NKX2.1* control and KO cell progenitors. Data  
337 represented as mean  $\pm$  SEM. \* = p<0.05. B) RT-PCR data comparing gene expression levels between  
338 *SFTA3* control and KO cell progenitors. Data represented as mean  $\pm$  SEM. \* = p<0.05. C) Composite  
339 confocal microscopy images that show day 25 immunolabeling of control and knockout hESNs  
340 following differentiation to MGE-like fate. All hESC-derived cells (HuNu, green) and other markers in  
341 red are indicated in each panel. Markers label progenitors of the ventral forebrain (NKX2.1, DLX2,  
342 Olig2), immature neurons (DCX), neural stem cells (nestin), and telencephalic progenitors (FOXG1).  
343 Scale bar = 20  $\mu$ m. D) Quantification of day 25 immunocytochemistry. Data represented as mean  $\pm$   
344 SEM. \*\*\* = p<0.001, \*\* = p<0.01, \* = p<0.05 (ANOVA).

345

346 **Figure 3.** Characterization of mature hESC-derived neurons from day 45 *SFTA3* and *NKX2.1* KO lines.  
347 A) Composite micrographs representing day 45 immunocytochemistry of mature inhibitory interneurons  
348 differentiated from control and KO hESNs. Immunolabeling for markers of immature neuronal  
349 precursor cells (DCX), mature neurons (MAP2) and GABAergic neurons (GABA). Scale bar =100  $\mu$ m.  
350 B) Day 45 immunocytochemistry quantification analysis of GABA, DCX, and MAP2 expression. Data  
351 represented as  $\pm$  SEM. \*\*\* = p<0.001, \*\* = p<0.01, \* = p<0.05 (ANOVA).

352

353 **Acknowledgements**

354

355 This work was funded by grant 13-SCC-WES-01 from the Connecticut Regenerative Medicine Research  
356 Fund to L. Gabel.

357

358 **Supplementary Figure Legends**

359 **Supplemental Figure 1.** Verification of *NKX2.1* and *SFTA3* gene knockout in hESC lines. A) qRT-PCR  
360 data comparing *NKX2.1* and *SFTA3* expression levels between day 25 *NKX2.1* control and KO cell  
361 progenitors. Data represented as mean  $\pm$  SEM. \* =  $p < 0.05$ . B) qRT-PCR data comparing *NKX2.1* and  
362 *SFTA3* gene expression between day 25 *SFTA3* control and KO cell progenitors. Data represented as  
363 mean  $\pm$  SEM. \* =  $p < 0.05$ . C) Day 25 immunocytochemistry analysis of *NKX2.1* and *SFTA3* knockout  
364 and control hESNPs. Scale bar = 20  $\mu$ m

365  
366 **Supplementary Table 1.** *SFTA3* and *NKX2.1* transcriptome data of correlation and fold change  
367 measurements.

368

369

370

## References

- 371  
372
- 373 1. Qiu M, Shimamura K, Sussel L, Chen S, Rubenstein JL. Control of anteroposterior and  
374 dorsoventral domains of Nkx-6.1 gene expression relative to other Nkx genes during vertebrate  
375 CNS development. *Mechanisms of development*. 1998;72(1-2):77-88.
  - 376 2. Shimamura K, Rubenstein JL. Inductive interactions direct early regionalization of the  
377 mouse forebrain. *Development (Cambridge, England)*. 1997;124(14):2709-18.
  - 378 3. Sussel L, Marin O, Kimura S, Rubenstein JL. Loss of Nkx2.1 homeobox gene function  
379 results in a ventral to dorsal molecular respecification within the basal telencephalon: evidence  
380 for a transformation of the pallidum into the striatum. *Development (Cambridge, England)*.  
381 1999;126(15):3359-70.
  - 382 4. Anderson SA, Classey JD, Conde F, Lund JS, Lewis DA. Synchronous development of  
383 pyramidal neuron dendritic spines and parvalbumin-immunoreactive chandelier neuron axon  
384 terminals in layer III of monkey prefrontal cortex. *Neuroscience*. 1995;67(1):7-22.
  - 385 5. Anderson SA, Marin O, Horn C, Jennings K, Rubenstein JL. Distinct cortical migrations  
386 from the medial and lateral ganglionic eminences. *Development (Cambridge, England)*.  
387 2001;128(3):353-63.
  - 388 6. Lavdas AA, Grigoriou M, Pachnis V, Parnavelas JG. The medial ganglionic eminence  
389 gives rise to a population of early neurons in the developing cerebral cortex. *The Journal of*  
390 *neuroscience : the official journal of the Society for Neuroscience*. 1999;19(18):7881-8.
  - 391 7. Wichterle H, Garcia-Verdugo JM, Herrera DG, Alvarez-Buylla A. Young neurons from  
392 medial ganglionic eminence disperse in adult and embryonic brain. *Nature neuroscience*.  
393 1999;2(5):461-6.
  - 394 8. Xu Q, Wonders CP, Anderson SA. Sonic hedgehog maintains the identity of cortical  
395 interneuron progenitors in the ventral telencephalon. *Development (Cambridge, England)*.  
396 2005;132(22):4987-98.
  - 397 9. Butt SJ, Sousa VH, Fuccillo MV, Hjerling-Leffler J, Miyoshi G, Kimura S, et al. The  
398 requirement of Nkx2-1 in the temporal specification of cortical interneuron subtypes. *Neuron*.  
399 2008;59(5):722-32.
  - 400 10. Du T, Xu Q, Ocbina PJ, Anderson SA. NKX2.1 specifies cortical interneuron fate by  
401 activating Lhx6. *Development (Cambridge, England)*. 2008;135(8):1559-67.
  - 402 11. Ohkubo Y, Chiang C, Rubenstein JL. Coordinate regulation and synergistic actions of  
403 BMP4, SHH and FGF8 in the rostral prosencephalon regulate morphogenesis of the  
404 telencephalic and optic vesicles. *Neuroscience*. 2002;111(1):1-17.
  - 405 12. Chen CY, Plocik A, Anderson NC, Moakley D, Boyi T, Dundes C, et al. Transcriptome  
406 and in Vitro Differentiation Profile of Human Embryonic Stem Cell Derived NKX2.1-Positive  
407 Neural Progenitors. *Stem cell reviews*. 2016;12(6):744-56.



- 408 13. Hartshorn KL, Crouch E, White MR, Colamussi ML, Kakkanatt A, Tauber B, et al.  
409 Pulmonary surfactant proteins A and D enhance neutrophil uptake of bacteria. *The American*  
410 *journal of physiology*. 1998;274(6 Pt 1):L958-69.
- 411 14. Kishore U, Greenhough TJ, Waters P, Shrive AK, Ghai R, Kamran MF, et al. Surfactant  
412 proteins SP-A and SP-D: structure, function and receptors. *Molecular immunology*.  
413 2006;43(9):1293-315.
- 414 15. Serrano AG, Perez-Gil J. Protein-lipid interactions and surface activity in the pulmonary  
415 surfactant system. *Chemistry and physics of lipids*. 2006;141(1-2):105-18.
- 416 16. Veldhuizen R, Nag K, Orgeig S, Possmayer F. The role of lipids in pulmonary surfactant.  
417 *Biochimica et biophysica acta*. 1998;1408(2-3):90-108.
- 418 17. Schicht M, Rausch F, Finotto S, Mathews M, Mattil A, Schubert M, et al. SFTA3, a  
419 novel protein of the lung: three-dimensional structure, characterisation and immune activation.  
420 *The European respiratory journal*. 2014;44(2):447-56.
- 421 18. Diler E, Schicht M, Rabung A, Tschernig T, Meier C, Rausch F, et al. The novel  
422 surfactant protein SP-H enhances the phagocytosis efficiency of macrophage-like cell lines U937  
423 and MH-S. *BMC research notes*. 2014;7:851.
- 424 19. Rausch F, Schicht M, Brauer L, Paulsen F, Brandt W. Protein modeling and molecular  
425 dynamics simulation of the two novel surfactant proteins SP-G and SP-H. *Journal of molecular*  
426 *modeling*. 2014;20(11):2513.
- 427 20. Maeda Y, Dave V, Whitsett JA. Transcriptional control of lung morphogenesis.  
428 *Physiological reviews*. 2007;87(1):219-44.
- 429 21. Barnett CP, Mencil JJ, Gecz J, Waters W, Kirwin SM, Vinette KM, et al.  
430 Choreoathetosis, congenital hypothyroidism and neonatal respiratory distress syndrome with  
431 intact NKX2-1. *American journal of medical genetics Part A*. 2012;158a(12):3168-73.
- 432 22. Carre A, Szinnai G, Castanet M, Sura-Trueba S, Tron E, Broutin-L'Hermite I, et al. Five  
433 new TTF1/NKX2.1 mutations in brain-lung-thyroid syndrome: rescue by PAX8 synergism in  
434 one case. *Human molecular genetics*. 2009;18(12):2266-76.
- 435 23. Herriges MJ, Swarr DT, Morley MP, Rathi KS, Peng T, Stewart KM, et al. Long  
436 noncoding RNAs are spatially correlated with transcription factors and regulate lung  
437 development. *Genes & development*. 2014;28(12):1363-79.
- 438 24. Herriges MJ, Tischfield DJ, Cui Z, Morley MP, Han Y, Babu A, et al. The NNCI-  
439 Nkx2.1 gene duplex buffers Nkx2.1 expression to maintain lung development and homeostasis.  
440 *Genes & development*. 2017;31(9):889-903.
- 441 25. Germain ND, Banda EC, Becker S, Naegele JR, Grabel LB. Derivation and isolation of  
442 NKX2.1-positive basal forebrain progenitors from human embryonic stem cells. *Stem cells and*  
443 *development*. 2013;22(10):1477-89.

- 444 26. Banda E, McKinsey A, Germain N, Carter J, Anderson NC, Grabel L. Cell polarity and  
445 neurogenesis in embryonic stem cell-derived neural rosettes. *Stem cells and development*.  
446 2015;24(8):1022-33.
- 447 27. Machold R, Hayashi S, Rutlin M, Muzumdar MD, Nery S, Corbin JG, et al. Sonic  
448 hedgehog is required for progenitor cell maintenance in telencephalic stem cell niches. *Neuron*.  
449 2003;39(6):937-50.
- 450 28. Xu Q, Guo L, Moore H, Waclaw RR, Campbell K, Anderson SA. Sonic hedgehog  
451 signaling confers ventral telencephalic progenitors with distinct cortical interneuron fates.  
452 *Neuron*. 2010;65(3):328-40.
- 453 29. Wonders CP, Anderson SA. The origin and specification of cortical interneurons. *Nature*  
454 *reviews Neuroscience*. 2006;7(9):687-96.
- 455 30. Xu Q, Cobos I, De La Cruz E, Rubenstein JL, Anderson SA. Origins of cortical  
456 interneuron subtypes. *The Journal of neuroscience : the official journal of the Society for*  
457 *Neuroscience*. 2004;24(11):2612-22.
- 458

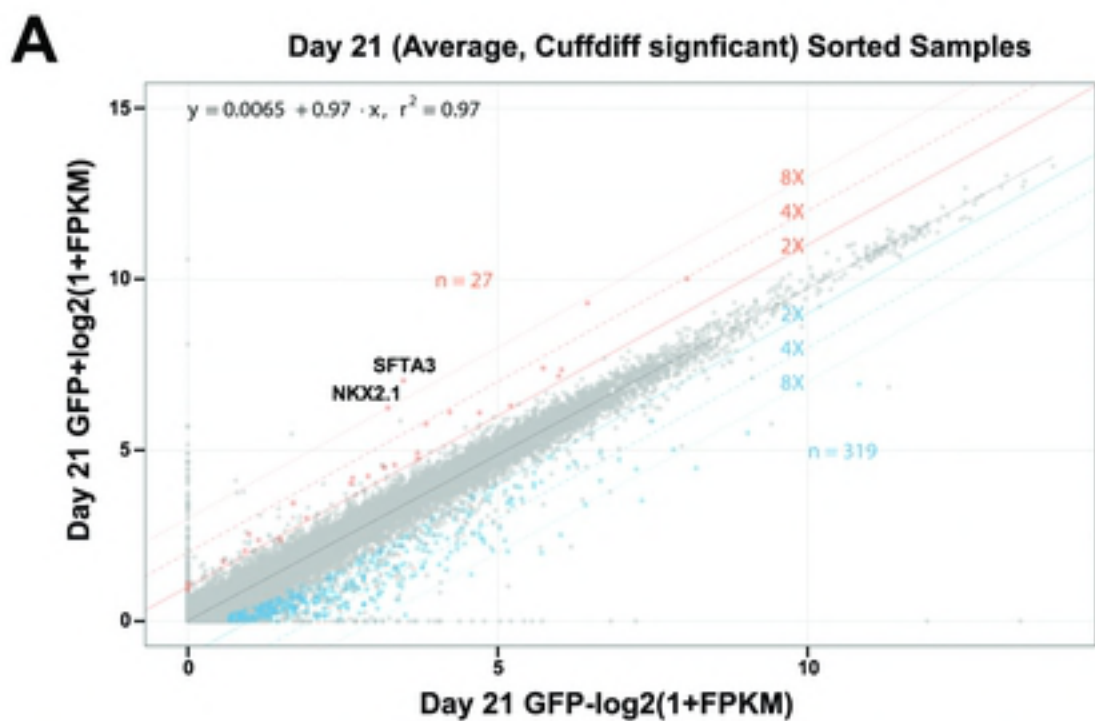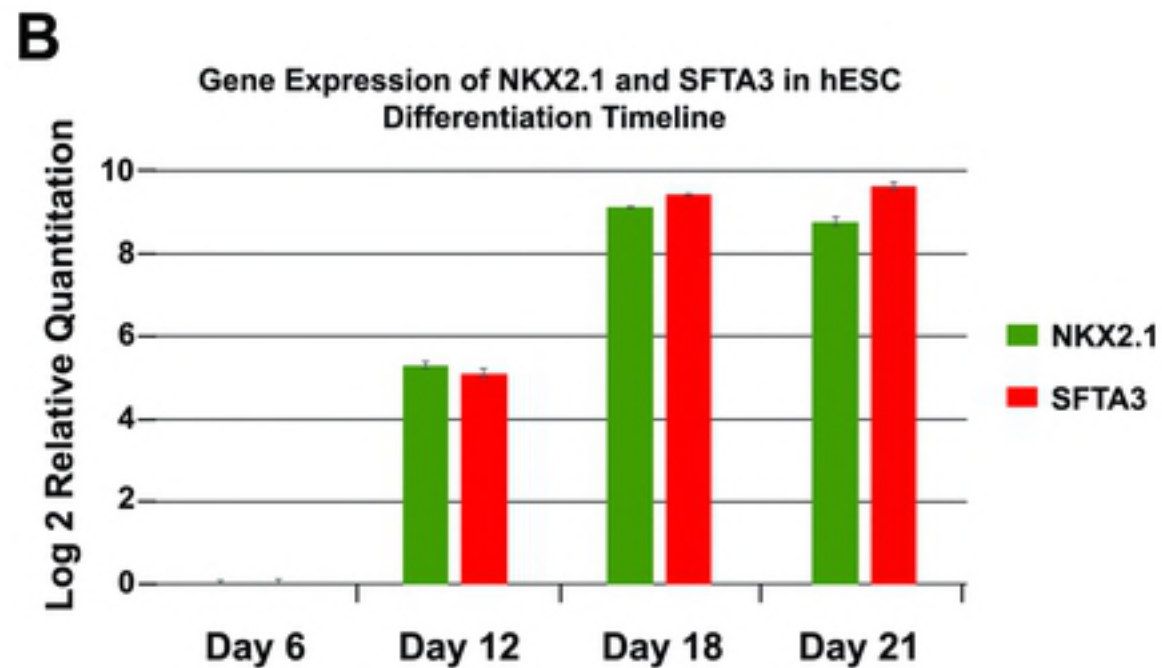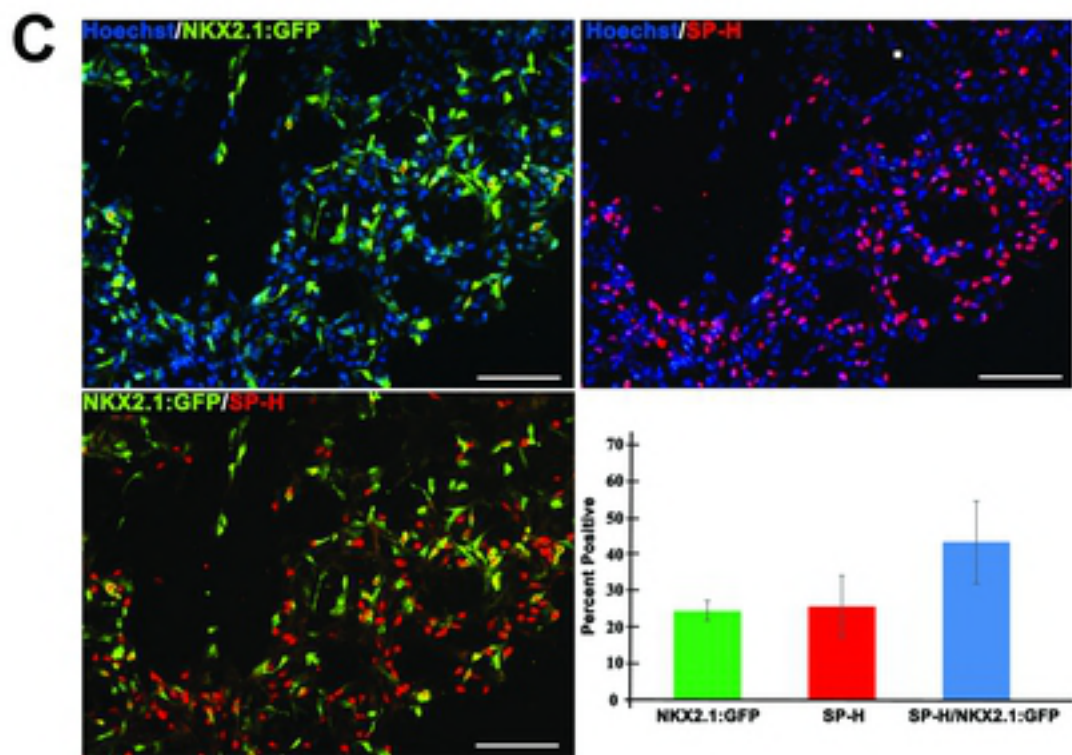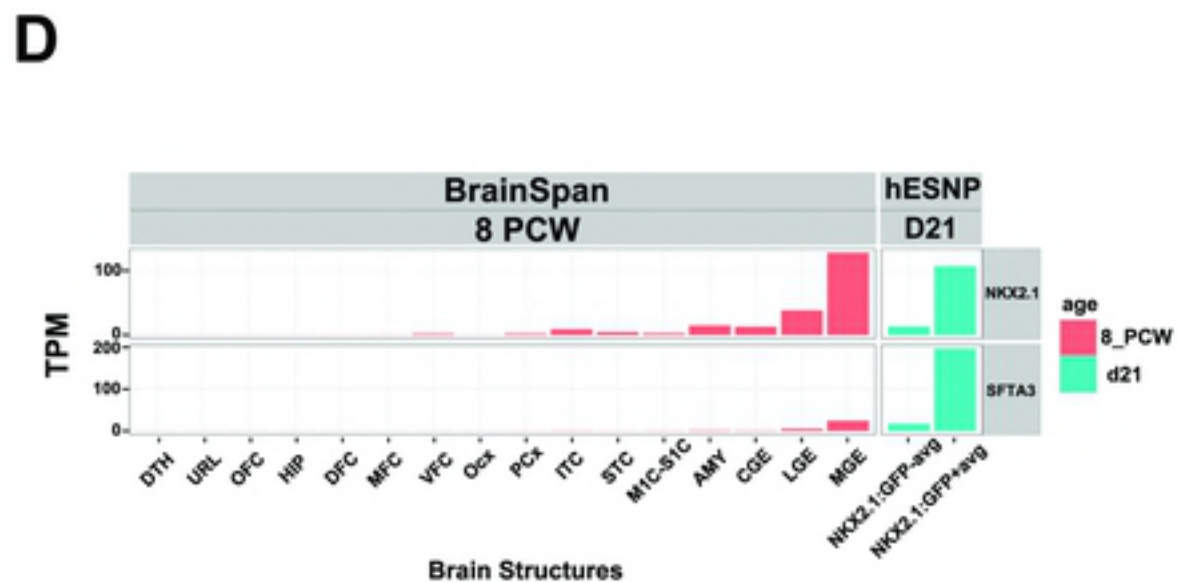

**A**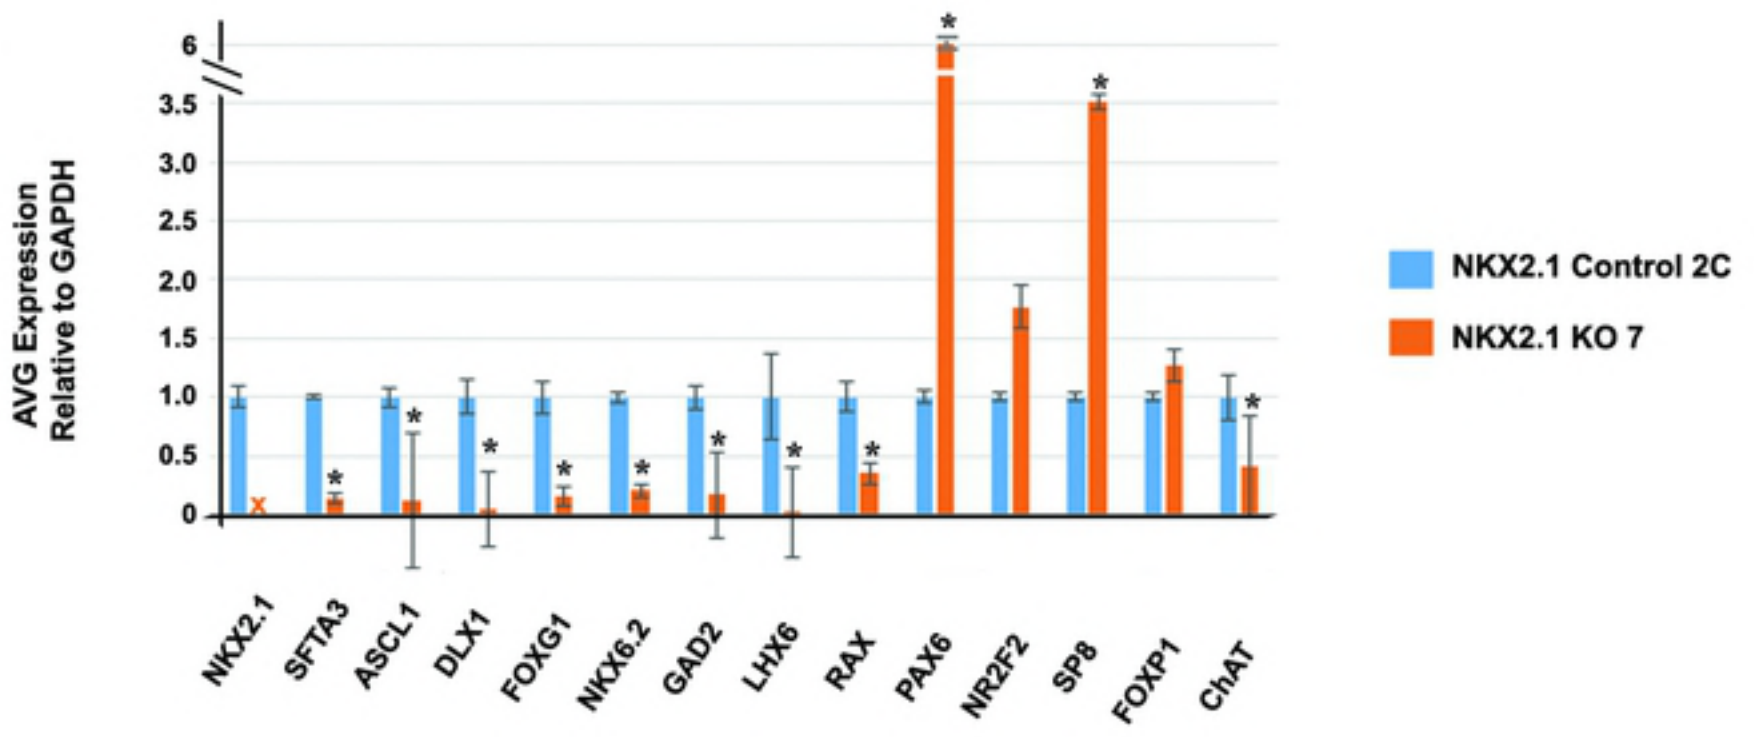**B**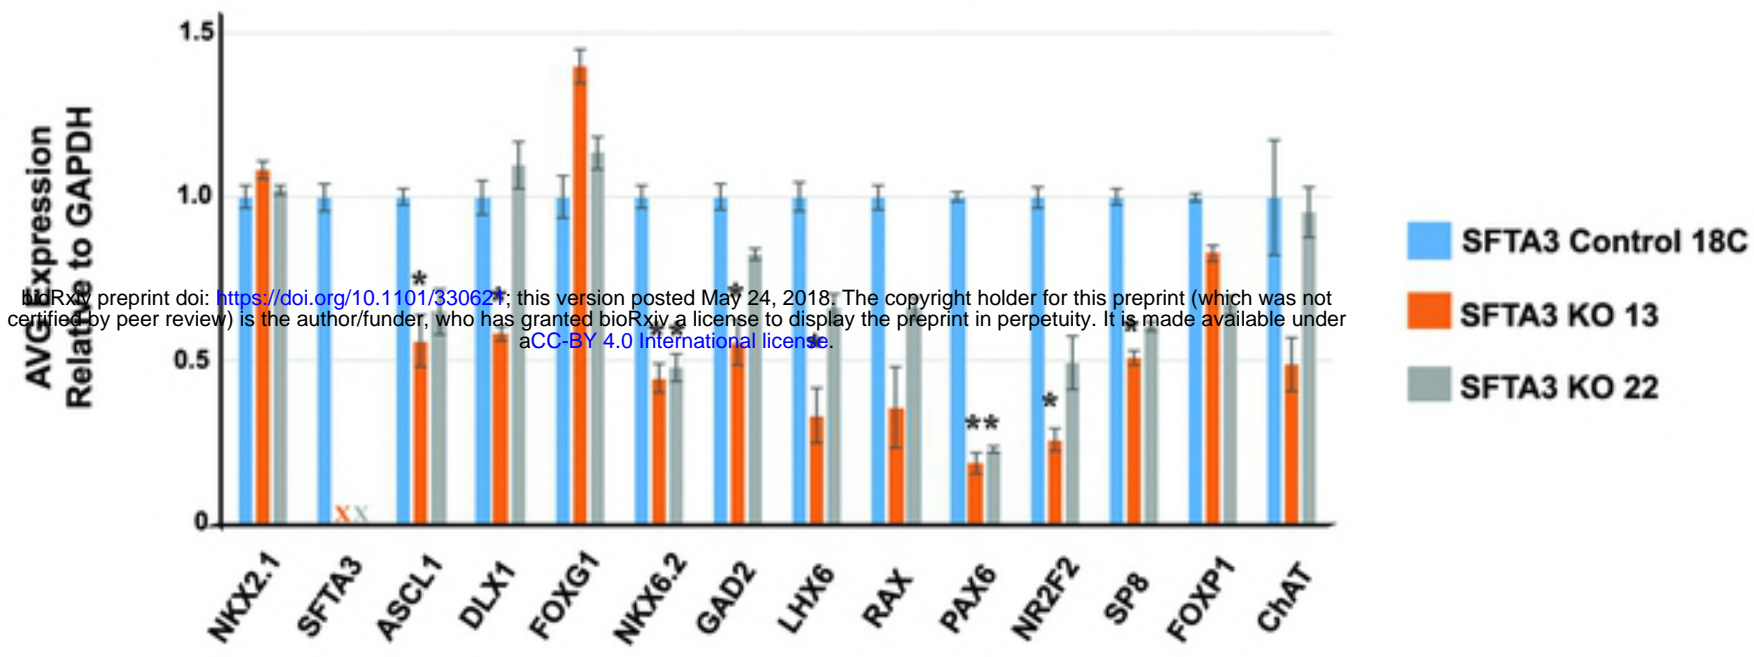

bioRxiv preprint doi: <https://doi.org/10.1101/330627>; this version posted May 24, 2018. The copyright holder for this preprint (which was not certified by peer review) is the author/funder, who has granted bioRxiv a license to display the preprint in perpetuity. It is made available under aCC-BY 4.0 International license.

**C**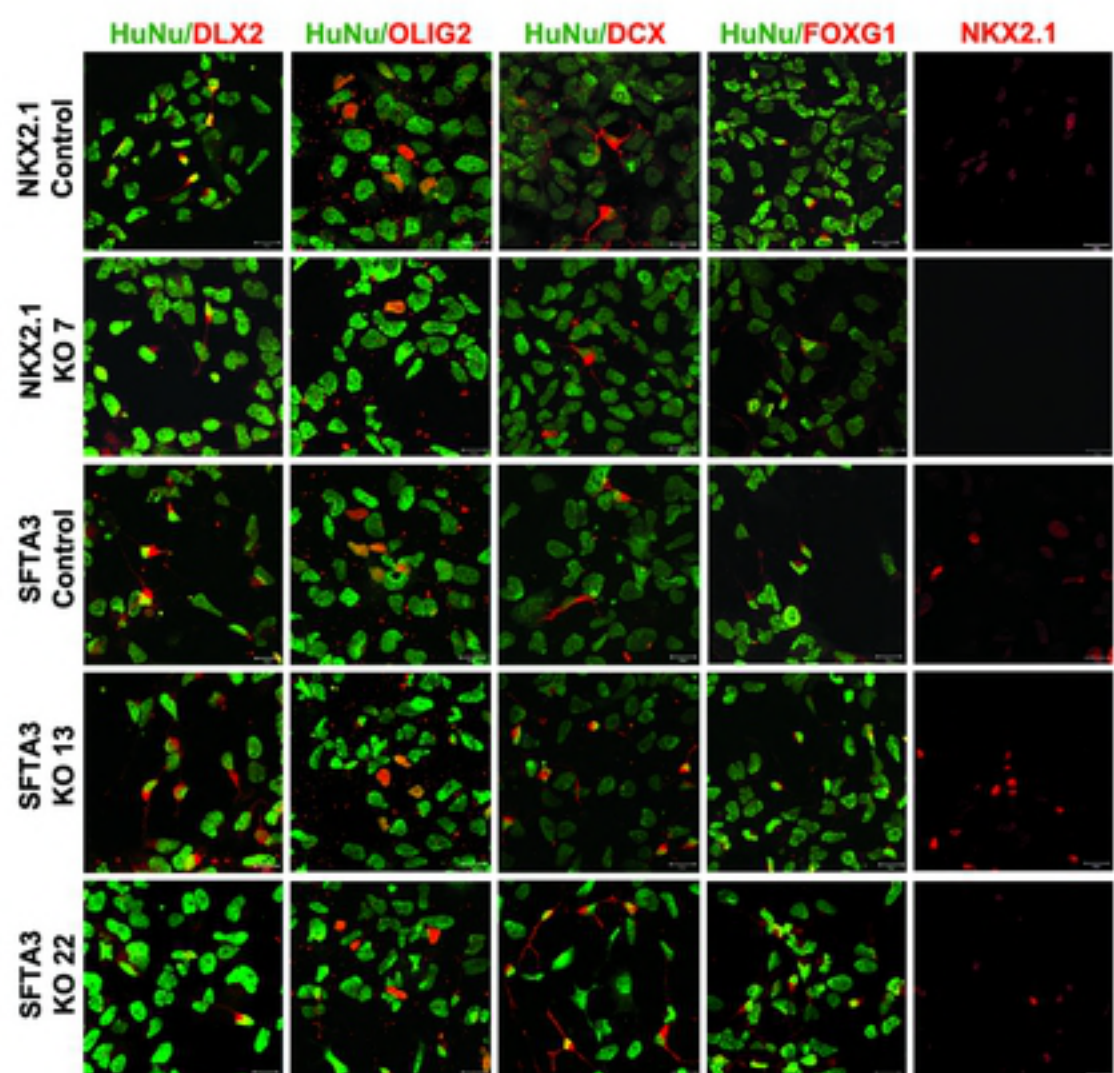**D**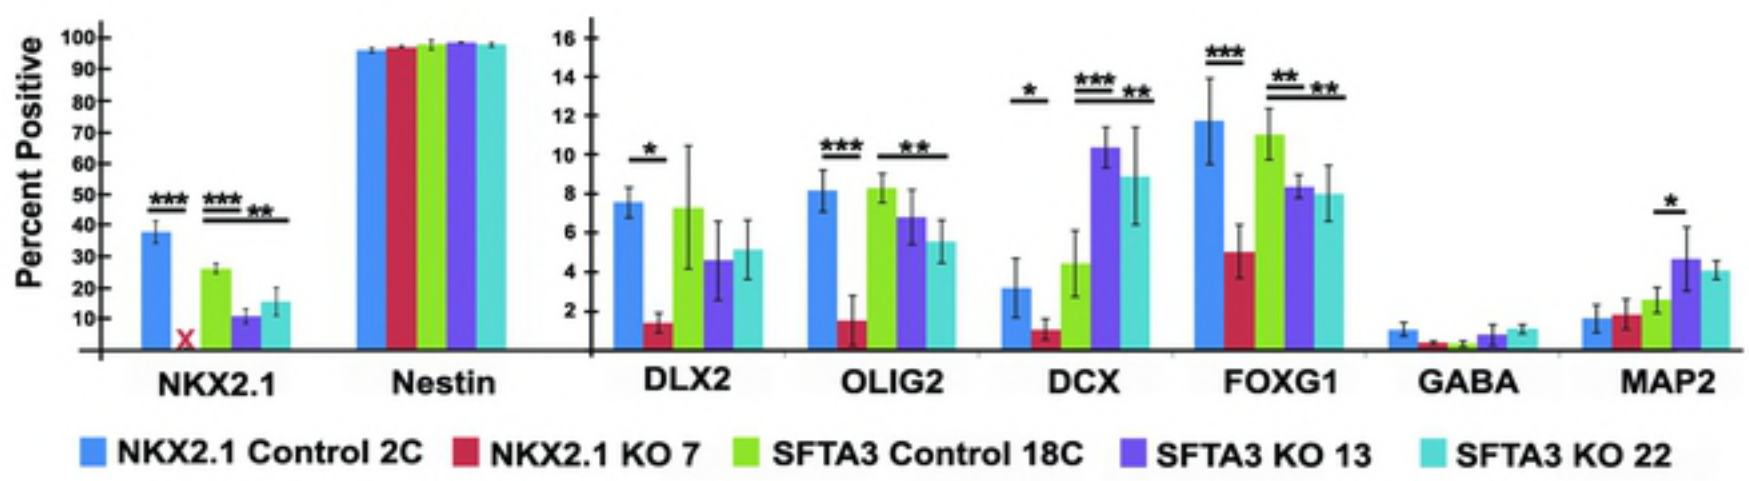

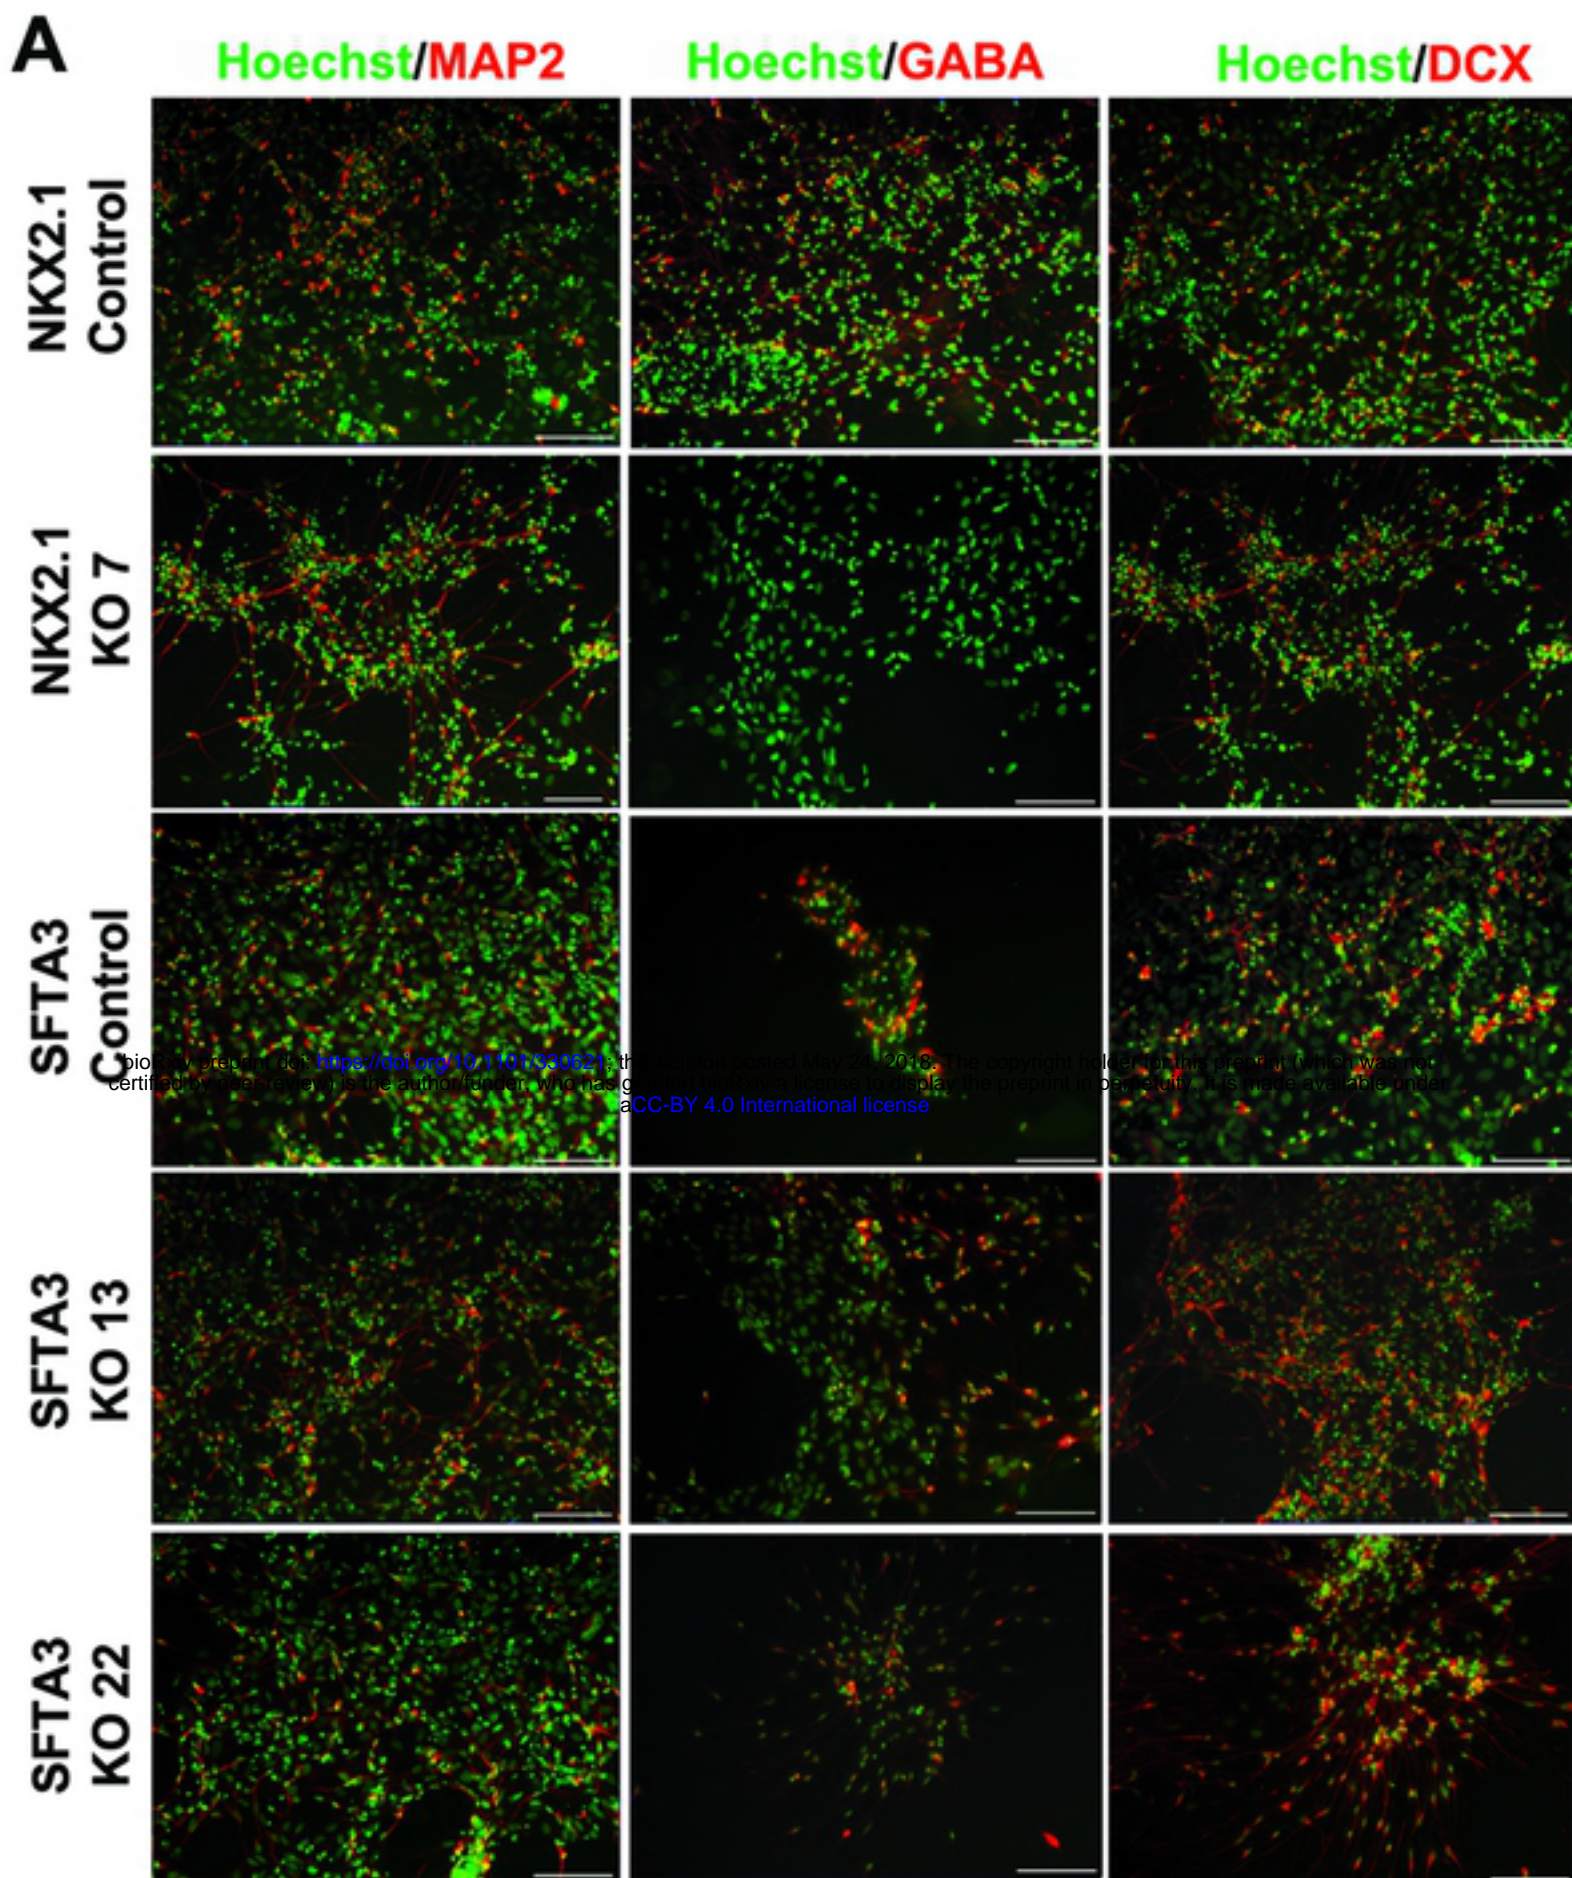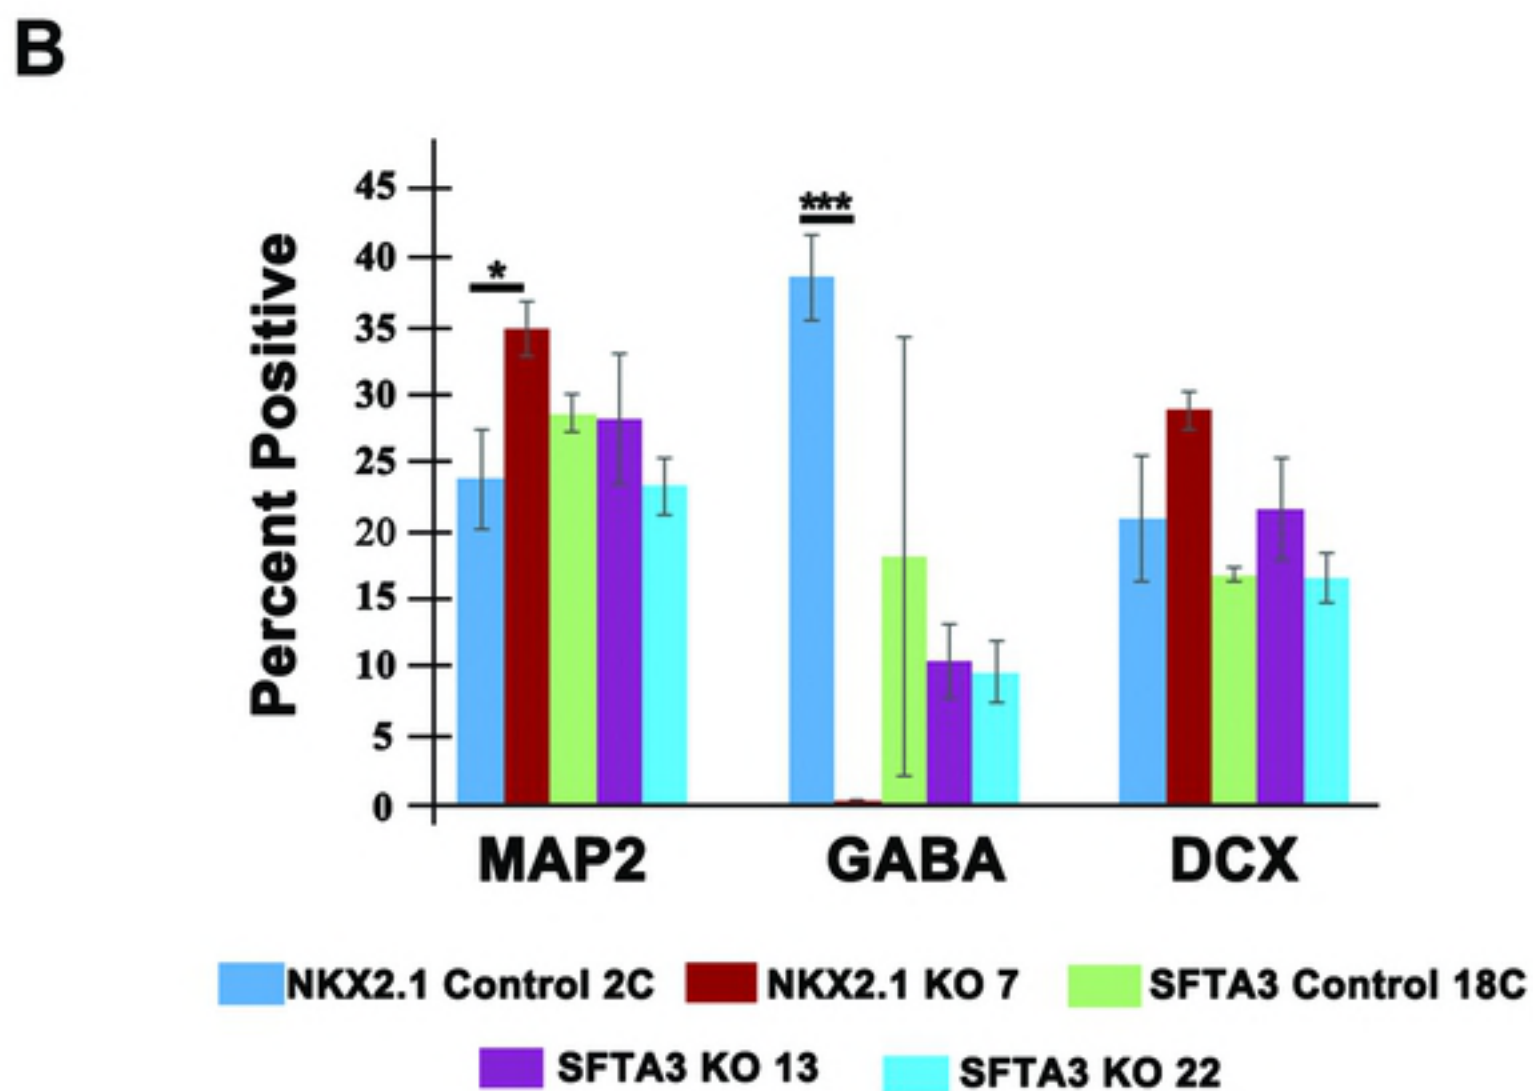

Source: https://www.biorxiv.org/content/10.1101/330621v1.full.pdf
